# Supplementary material for: Strong External Electric Fields Reduce Explosive Sensitivity: A Theoretical Investigation into the Reaction Selectivity in NH2NO2∙∙∙NH3
Source: MDPI journal article supplement (doi:10.3390/molecules28062586), 2023-03-13
Supplement: s1 [file s1]

## Supporting information

### Strong external electric fields reduce explosive sensitivity. A theoretical investigation into the reaction selectivity in $\text{NH}_2\text{NO}_2\cdots\text{NH}_3$

Fu-de Ren, Ying-zhe Liu, Xiao-lei Wang, Li-li Qiu, Zi-hui Meng, Xiang Cheng, Yong-xiang Li

#### Supplementary Tables

**Table S1** Barriers ( $E_a$ ) and bond dissociation energies (BDE) at the MP2/6-311++G(2d,p) and CCSD(T)/6-311++G(2d,p)//MP2/6-311++G(2d,p) levels.

**Table S2** The optimized geometrical parameters in the different field strengths and orientations at the MP2/6-311++G(2d,p) level.

**Table S3.** Transition states imaginary frequencies, Gibbs energies, reaction rate constants, Wigner tunneling corrections in the absence and presence of fields of varying strengths and directions for TS1.

**Table S4** Mulliken charges and APT charges of the atoms as well as the index of imaginary vibration (  $\overline{A_{\text{H}7}}$  and  $\overline{A_{\text{H}5}}$  ) of TS1 under the  $-x$ -direction field at the MP2/6-311++G(2d,p) level.

**Table S5** Mulliken charges and APT charges of the atoms of TS2 under the  $-x$ -direction field at the MP2/6-311++G(2d,p) level.

**Table S6** Transition states imaginary frequencies, Gibbs energies, reaction rate constants, Wigner tunneling corrections in the absence and presence of fields of varying strengths and directions for TS2.

**Figure S1**  $\text{NH}_2\text{NO}_2\cdots\text{NH}_3$ , in which  $\text{NH}_3$  is only as a H-bonded donor.

**Figure S2** Changes of the activation distances versus field strengths in the different field orientations for transition states at the MP2/6-311++G(2d,p) level.

**Figure S3** The research scheme for the effects of external electric fields on the initiation reactions in  $\text{NH}_2\text{NO}_2\cdots\text{NH}_3$ .

**Cartesian coordinates for the optimized geometries of reactant and transition states in the different external field strengths and orientations as well as in the absence of field.**

**Table S1** Barriers ( $E_a$ ) and bond dissociation energies (BDE) at the MP2/6-311++G(2d,p) and CCSD(T)/6-311++G(2d,p)//MP2/6-311++G(2d,p) levels.

| Field      | $E_{a,TS1}(MP2)$ | $E_{a,TS1}(CCSD(T))$ | $E_{a,TS2}(MP2)$ | $E_{a,TS2}(CCSD(T))$ | BDE(MP2) | BDE(CCSD(T)) |
|------------|------------------|----------------------|------------------|----------------------|----------|--------------|
| No field   | 68.38            | 77.16                | 176.15           | 190.25               | 257.63   | 239.12       |
| $z$ -0.010 | 71.29            | 79.26                | 235.4            | 246.18               | 252.05   | 236.75       |
| $z$ -0.008 | 75.04            | 81.14                | 219.18           | 237.22               | 253.89   | 227.01       |
| $z$ -0.006 | 67.02            | 76.55                | 210.22           | 233.12               | 255.72   | 238.46       |
| $z$ -0.004 | 69.18            | 79.13                | 190.18           | 208.51               | 256.18   | 238.85       |
| $z$ -0.002 | 70.22            | 78.27                | 181.23           | 200.17               | 257.54   | 239.07       |
| $z$ +0.002 | 71.08            | 79.15                | 176.51           | 191.32               | 258.19   | 241.5        |
| $z$ +0.004 | 68.99            | 78.53                | 172.18           | 186.57               | 258.42   | 243.64       |
| $z$ +0.006 | 72.17            | 79.26                | 170.66           | 185.03               | 259.76   | 245.57       |
| $z$ +0.008 | 70.02            | 81.18                | 156.03           | 172.31               | 261.22   | 247.16       |
| $z$ +0.010 | 74.18            | 85.62                | 158.94           | 177.22               | 262.18   | 248.64       |
| $y$ -0.010 | 86.55            | 95.17                | 195.62           | 212.31               | 247.92   | 235.32       |
| $y$ -0.008 | 81.22            | 94.02                | 194.28           | 213.58               | 249.58   | 238.45       |
| $y$ -0.006 | 73.17            | 85.18                | 192.1            | 212.12               | 250.61   | 240.42       |
| $y$ -0.004 | 70.89            | 82.03                | 187.18           | 208.53               | 253.26   | 238.94       |
| $y$ -0.002 | 74.25            | 82.96                | 183.25           | 192.54               | 255.2    | 239.13       |
| $y$ +0.002 | 73.17            | 83.27                | 181.16           | 190.62               | 259.18   | 242.01       |
| $y$ +0.004 | 74.22            | 85.18                | 184.23           | 195.18               | 262.25   | 244.72       |
| $y$ +0.006 | 75.89            | 87.22                | 190.55           | 209.32               | 265.37   | 246.84       |
| $y$ +0.008 | 79.03            | 91.05                | 202.58           | 219.18               | 267.85   | 248.89       |
| $y$ +0.010 | 87.92            | 98.28                | 214.56           | 228.17               | 269.3    | 259.29       |
| $x$ +0.010 | 45.89            | 57.03                | 168.51           | 181.55               |          |              |
| $x$ +0.008 |                  |                      | 169.51           | 181.17               |          |              |
| $x$ +0.006 |                  |                      | 170.22           | 182.18               |          |              |
| $x$ +0.004 | 48.02            | 60.18                | 175.36           | 186.05               | 256.03   | 236.36       |
| $x$ +0.002 | 50.40            | 60.13                | 174.01           | 188.51               | 256.92   | 239.25       |
| $x$ -0.002 | 86.41            | 97.14                | 178.4            | 193.06               | 258.5    | 239.25       |
| $x$ -0.004 | 100.98           | 116.55               | 179.28           | 194.22               | 261.26   | 242.42       |
| $x$ -0.006 | 114.02           | 132.23               | 182.03           | 196.53               | 262.74   | 246.98       |
| $x$ -0.008 | 143.49           | 161.53               | 183.28           | 195.89               | 267.91   | 250.69       |
| $x$ -0.010 | 183.98           | 206.28               | 190.18           | 203.24               | 270.18   | 255.38       |
| $x$ -0.012 | 202.17           | 207.16               | 205.14           | 218.19               |          |              |
| $x$ -0.014 | 239.18           | 257.18               | 212.57           | 230.17               |          |              |
| $x$ -0.016 | 253.22           | 279.06               | 229.32           | 245.18               |          |              |
| $x$ -0.018 | 262.17           | 284.18               | 234.18           | 249.55               |          |              |
| $x$ -0.019 | 275.10           | 288.62               | 242.07           | 256.18               |          |              |
| $x$ -0.020 | 291.35           | 296.52               | 257.09           | 272.18               |          |              |

**Table S2** The optimized geometrical parameters in the different field strengths and orientations at the MP2/6-311++G(2d,p) level.

| Field   | TS1                  |                      |                      |                      |                      |                      | TS2                  |                      |                      |                      |                      |                      |
|---------|----------------------|----------------------|----------------------|----------------------|----------------------|----------------------|----------------------|----------------------|----------------------|----------------------|----------------------|----------------------|
|         | R <sub>O8...H7</sub> | R <sub>H7...N6</sub> | R <sub>N6...H5</sub> | R <sub>H5...N1</sub> | R <sub>N1...H4</sub> | R <sub>H4...O3</sub> | R <sub>O8...H7</sub> | R <sub>H7...N6</sub> | R <sub>N6...H5</sub> | R <sub>H5...N1</sub> | R <sub>N1...H4</sub> | R <sub>H4...O3</sub> |
| Nofield | 1.607                | 1.073                | 1.100                | 1.580                | 1.019                | 2.260                | 2.700                | 1.018                | 1.905                | 1.040                | 1.291                | 1.320                |
| z-0.010 | 1.483                | 1.128                | 1.137                | 1.523                | 1.018                | 2.247                | 2.244                | 1.020                | 2.129                | 1.030                | 1.288                | 1.314                |
| z-0.008 | 1.528                | 1.113                | 1.131                | 1.530                | 1.019                | 2.250                | 2.262                | 1.020                | 2.078                | 1.032                | 1.286                | 1.318                |
| z-0.006 | 1.553                | 1.099                | 1.123                | 1.545                | 1.017                | 2.255                | 2.307                | 1.020                | 2.033                | 1.033                | 1.285                | 1.320                |
| z-0.004 | 1.572                | 1.085                | 1.115                | 1.562                | 1.019                | 2.256                | 2.376                | 1.019                | 1.987                | 1.035                | 1.283                | 1.324                |
| z-0.002 | 1.591                | 1.077                | 1.108                | 1.573                | 1.019                | 2.258                | 2.491                | 1.018                | 1.945                | 1.038                | 1.287                | 1.322                |
| z+0.002 | 1.613                | 1.072                | 1.096                | 1.582                | 1.019                | 2.263                | 3.200                | 1.017                | 1.872                | 1.044                | 1.294                | 1.316                |
| z+0.004 | 1.627                | 1.067                | 1.088                | 1.588                | 1.018                | 2.265                | 4.019                | 1.016                | 1.872                | 1.045                | 1.298                | 1.310                |
| z+0.006 | 1.650                | 1.060                | 1.080                | 1.596                | 1.020                | 2.266                | 3.805                | 1.016                | 1.842                | 1.050                | 1.300                | 1.310                |
| z+0.008 | 1.658                | 1.057                | 1.075                | 1.600                | 1.020                | 2.269                | 3.948                | 1.016                | 1.827                | 1.054                | 1.304                | 1.307                |
| z+0.01  | 1.688                | 1.055                | 1.061                | 1.612                | 1.019                | 2.272                | 4.534                | 1.017                | 1.829                | 1.055                | 1.312                | 1.300                |
| y-0.010 | 1.681                | 1.060                | 1.072                | 1.618                | 1.021                | 2.245                | 2.735                | 1.016                | 1.907                | 1.043                | 1.297                | 1.315                |
| y-0.008 | 1.667                | 1.066                | 1.081                | 1.613                | 1.019                | 2.247                | 2.722                | 1.016                | 1.909                | 1.042                | 1.294                | 1.318                |
| y-0.006 | 1.640                | 1.068                | 1.090                | 1.600                | 1.019                | 2.252                | 2.713                | 1.016                | 1.908                | 1.042                | 1.293                | 1.318                |
| y-0.004 | 1.622                | 1.072                | 1.095                | 1.587                | 1.020                | 2.256                | 2.708                | 1.018                | 1.908                | 1.041                | 1.293                | 1.319                |
| y-0.002 | 1.610                | 1.072                | 1.097                | 1.583                | 1.019                | 2.260                | 2.703                | 1.018                | 1.906                | 1.040                | 1.292                | 1.320                |
| y+0.002 | 1.608                | 1.070                | 1.098                | 1.581                | 1.019                | 2.257                | 2.711                | 1.017                | 1.906                | 1.040                | 1.292                | 1.320                |
| y+0.004 | 1.626                | 1.068                | 1.092                | 1.592                | 1.018                | 2.256                | 2.713                | 1.018                | 1.907                | 1.041                | 1.293                | 1.318                |
| y+0.006 | 1.640                | 1.063                | 1.083                | 1.598                | 1.019                | 2.254                | 2.719                | 1.019                | 1.909                | 1.041                | 1.294                | 1.317                |
| y+0.008 | 1.658                | 1.061                | 1.072                | 1.610                | 1.020                | 2.254                | 2.725                | 1.017                | 1.912                | 1.043                | 1.295                | 1.315                |
| y+0.010 | 1.672                | 1.058                | 1.068                | 1.616                | 1.020                | 2.253                | 2.730                | 1.017                | 1.915                | 1.044                | 1.297                | 1.314                |
| x+0.010 | 1.715                | 1.052                | 1.071                | 1.635                | 1.018                | 2.221                | 2.218                | 1.016                | 2.075                | 1.025                | 1.307                | 1.326                |
| x+0.008 | 1.712                | 1.055                | 1.080                | 1.629                | 1.017                | 2.223                | 2.239                | 1.018                | 2.068                | 1.030                | 1.300                | 1.327                |
| x+0.006 | 1.714                | 1.052                | 1.083                | 1.625                | 1.018                | 2.236                | 2.327                | 1.017                | 2.005                | 1.033                | 1.299                | 1.323                |
| x+0.004 | 1.716                | 1.053                | 1.092                | 1.613                | 1.018                | 2.244                | 2.458                | 1.017                | 1.988                | 1.035                | 1.295                | 1.323                |
| x+0.002 | 1.658                | 1.062                | 1.095                | 1.598                | 1.018                | 2.252                | 2.534                | 1.018                | 1.943                | 1.037                | 1.293                | 1.322                |
| x-0.002 | 1.562                | 1.084                | 1.106                | 1.559                | 1.019                | 2.268                | 3.017                | 1.018                | 1.874                | 1.044                | 1.290                | 1.317                |
| x-0.004 | 1.521                | 1.097                | 1.114                | 1.534                | 1.019                | 2.278                | 3.314                | 1.018                | 1.853                | 1.047                | 1.289                | 1.313                |
| x-0.006 | 1.481                | 1.111                | 1.124                | 1.507                | 1.020                | 2.288                | 2.940                | 1.018                | 1.833                | 1.053                | 1.286                | 1.313                |
| x-0.008 | 1.443                | 1.127                | 1.137                | 1.476                | 1.020                | 2.300                | 2.956                | 1.019                | 1.809                | 1.058                | 1.284                | 1.311                |
| x-0.010 | 1.467                | 1.117                | 1.100                | 1.606                | 1.026                | 2.303                | 2.955                | 1.019                | 1.785                | 1.064                | 1.283                | 1.310                |
| x-0.012 | 1.563                | 1.089                | 1.076                | 1.727                | 1.028                | 2.300                | 2.956                | 1.020                | 1.756                | 1.072                | 1.282                | 1.308                |
| x-0.014 | 1.402                | 1.102                | 1.058                | 1.652                | 1.029                | 2.322                | 2.949                | 1.020                | 1.725                | 1.081                | 1.281                | 1.306                |
| x-0.016 | 1.331                | 1.145                | 1.128                | 1.418                | 1.027                | 2.350                | 2.932                | 1.021                | 1.687                | 1.092                | 1.281                | 1.304                |
| x-0.018 | 1.256                | 1.258                | 1.253                | 1.382                | 1.025                | 2.368                | 2.904                | 1.021                | 1.637                | 1.110                | 1.282                | 1.302                |
| x-0.019 | 1.620                | 1.283                | 1.280                | 1.300                | 1.025                | 2.371                | 2.882                | 1.022                | 1.600                | 1.125                | 1.283                | 1.302                |
| x-0.020 | 1.187                | 1.315                | 1.315                | 1.255                | 1.024                | 2.382                | 2.835                | 1.022                | 1.535                | 1.154                | 1.286                | 1.299                |

**Table S3.** Transition states imaginary frequencies ( $\text{Im}\nu$ ,  $\text{cm}^{-1}$ ), Gibbs energies ( $\Delta G$ ,  $\text{kJ/mol}$ ), reaction rate constants ( $k$ ,  $\text{s}^{-1}$ ), Wigner tunneling corrections ( $\kappa$ ) in the absence and presence of fields of varying strengths and directions for the intermolecular hydrogen exchange path (TS1) at the MP2/6-311++G(2d,p) level

| Field    | $\text{Im}\nu$ | $\Delta G_{298.15}$ | $k_{298.15\text{ K}}$  | $k_{298.15\text{ K}}$ | $\Delta G_{688\text{ K}}$ | $k_{688\text{ K}}$     | $k_{688\text{ K}}$ |
|----------|----------------|---------------------|------------------------|-----------------------|---------------------------|------------------------|--------------------|
| No field | 368.4          | 70.58               | $2.86 \times 10^0$     | 1.132                 | 88.62                     | $2.68 \times 10^6$     | 1.025              |
| z-0.010  | 915.8          | 73.52               | $8.73 \times 10^{-1}$  | 1.815                 | 92.55                     | $1.35 \times 10^6$     | 1.153              |
| z-0.008  | 872.7          | 77.39               | $1.83 \times 10^{-1}$  | 1.740                 | 93.10                     | $1.22 \times 10^6$     | 1.139              |
| z-0.006  | 492.0          | 68.13               | $7.68 \times 10^0$     | 1.235                 | 85.62                     | $4.53 \times 10^6$     | 1.044              |
| z-0.004  | 379.3          | 71.55               | $1.93 \times 10^0$     | 1.140                 | 84.18                     | $5.82 \times 10^6$     | 1.026              |
| z-0.002  | 378.1          | 72.08               | $1.56 \times 10^0$     | 1.139                 | 86.03                     | $4.21 \times 10^6$     | 1.026              |
| z+0.002  | 355.6          | 73.02               | $1.07 \times 10^0$     | 1.123                 | 88.92                     | $2.54 \times 10^6$     | 1.023              |
| z+0.004  | 320.8          | 71.83               | $1.73 \times 10^0$     | 1.100                 | 90.41                     | $1.96 \times 10^6$     | 1.019              |
| z+0.006  | 337.0          | 74.03               | $7.11 \times 10^{-1}$  | 1.110                 | 92.50                     | $1.36 \times 10^6$     | 1.021              |
| z+0.008  | 293.5          | 72.59               | $1.27 \times 10^0$     | 1.084                 | 87.37                     | $3.33 \times 10^6$     | 1.016              |
| z+0.010  | 271.9          | 76.27               | $2.88 \times 10^{-1}$  | 1.072                 | 95.52                     | $8.02 \times 10^5$     | 1.013              |
| y-0.010  | 350.6          | 86.55               | $4.56 \times 10^{-3}$  | 1.119                 | 110.38                    | $5.97 \times 10^4$     | 1.022              |
| y-0.008  | 327.9          | 83.18               | $1.77 \times 10^{-2}$  | 1.104                 | 106.26                    | $1.23 \times 10^5$     | 1.020              |
| y-0.006  | 342.8          | 76.18               | $2.99 \times 10^{-1}$  | 1.114                 | 95.01                     | $8.76 \times 10^5$     | 1.021              |
| y-0.004  | 360.7          | 73.18               | $1.00 \times 10^0$     | 1.126                 | 89.17                     | $2.43 \times 10^6$     | 1.024              |
| y-0.002  | 367.6          | 76.92               | $2.22 \times 10^{-1}$  | 1.131                 | 92.35                     | $1.40 \times 10^6$     | 1.025              |
| y+0.002  | 335.1          | 75.00               | $4.81 \times 10^{-1}$  | 1.109                 | 93.25                     | $1.19 \times 10^6$     | 1.020              |
| y+0.004  | 320.7          | 76.24               | $2.92 \times 10^{-1}$  | 1.100                 | 95.18                     | $8.51 \times 10^5$     | 1.019              |
| y+0.006  | 303.5          | 78.24               | $1.30 \times 10^{-1}$  | 1.090                 | 91.00                     | $1.77 \times 10^6$     | 1.017              |
| y+0.008  | 349.2          | 82.66               | $2.19 \times 10^{-2}$  | 1.118                 | 106.36                    | $1.20 \times 10^5$     | 1.022              |
| y+0.010  | 341.8          | 90.03               | $1.12 \times 10^{-3}$  | 1.114                 | 108.27                    | $8.63 \times 10^4$     | 1.021              |
| x+0.010  | 262.0          | 48.04               | $2.54 \times 10^4$     | 1.067                 | 62.18                     | $2.72 \times 10^8$     | 1.013              |
| x+0.004  | 260.0          | 50.17               | $1.08 \times 10^4$     | 1.066                 | 60.54                     | $3.63 \times 10^8$     | 1.012              |
| x+0.002  | 310.4          | 52.99               | $3.45 \times 10^3$     | 1.094                 | 62.15                     | $2.74 \times 10^8$     | 1.018              |
| x-0.002  | 445.0          | 88.37               | $2.19 \times 10^{-3}$  | 1.192                 | 112.26                    | $4.30 \times 10^4$     | 1.036              |
| x-0.004  | 547.3          | 103.71              | $4.49 \times 10^{-6}$  | 1.291                 | 128.71                    | $2.42 \times 10^3$     | 1.055              |
| x-0.006  | 689.6          | 115.53              | $3.82 \times 10^{-8}$  | 1.462                 | 138.53                    | $4.35 \times 10^2$     | 1.087              |
| x-0.008  | 868.6          | 143.57              | $4.67 \times 10^{-13}$ | 1.733                 | 180.02                    | $3.08 \times 10^{-1}$  | 1.138              |
| x-0.010  | 649.2          | 183.67              | $4.41 \times 10^{-20}$ | 1.410                 | 227.18                    | $8.08 \times 10^{-5}$  | 1.077              |
| x-0.012  | 420.2          | 199.01              | $9.05 \times 10^{-23}$ | 1.172                 | 248.26                    | $2.03 \times 10^{-6}$  | 1.032              |
| x-0.014  | 1124.3         | 236.28              | $2.68 \times 10^{-29}$ | 2.228                 | 288.33                    | $1.84 \times 10^{-9}$  | 1.231              |
| x-0.016  | 1157.9         | 246.19              | $2.91 \times 10^{-31}$ | 2.303                 | 336.05                    | $4.38 \times 10^{-13}$ | 1.245              |
| x-0.018  | 1528.7         | 255.11              | $1.34 \times 10^{-32}$ | 3.271                 | 340.29                    | $2.09 \times 10^{-13}$ | 1.426              |
| x-0.019  | 1633.0         | 263.62              | $4.34 \times 10^{-34}$ | 3.591                 | 365.03                    | $2.76 \times 10^{-15}$ | 1.487              |
| x-0.020  | 1638.5         | 278.33              | $1.15 \times 10^{-36}$ | 3.609                 | 368.81                    | $1.43 \times 10^{-15}$ | 1.490              |

**Table S4** Mulliken charges and APT charges (in bold) of the atoms as well as the index of imaginary vibration (  $\overline{A_{H7}}$  and  $\overline{A_{H5}}$  ) of TS1 under the  $-x$ -direction field at the MP2/6-311++G(2d,p) level.

|                     | <b>0.000</b>  | <b>-0.002</b> | <b>-0.004</b> | <b>-0.006</b> | <b>-0.008</b> | <b>-0.010</b> | <b>-0.012</b> | <b>-0.014</b> | <b>-0.016</b> | <b>-0.018</b> | <b>-0.019</b> | <b>-0.020</b> |
|---------------------|---------------|---------------|---------------|---------------|---------------|---------------|---------------|---------------|---------------|---------------|---------------|---------------|
| O8                  | -0.444        | -0.448        | -0.452        | -0.455        | -0.457        | -0.463        | -0.474        | -0.460        | -0.452        | -0.443        | -0.439        | -0.430        |
|                     | <b>-0.901</b> | <b>-0.916</b> | <b>-0.928</b> | <b>-0.938</b> | <b>-0.946</b> | <b>-0.936</b> | <b>-0.933</b> | <b>-0.928</b> | <b>-0.927</b> | <b>-0.923</b> | <b>-0.920</b> | <b>-0.918</b> |
| H7                  | 0.495         | 0.512         | 0.528         | 0.545         | 0.561         | 0.525         | 0.474         | 0.468         | 0.499         | 0.613         | 0.630         | 0.634         |
|                     | <b>0.523</b>  | <b>0.549</b>  | <b>0.573</b>  | <b>0.596</b>  | <b>0.618</b>  | <b>0.574</b>  | <b>0.511</b>  | <b>0.503</b>  | <b>0.540</b>  | <b>0.625</b>  | <b>0.667</b>  | <b>0.679</b>  |
| N6                  | -0.786        | -0.813        | -0.840        | -0.872        | -0.907        | -0.818        | -0.718        | -0.922        | -1.023        | -1.078        | -1.145        | -1.195        |
|                     | <b>-0.600</b> | <b>-0.628</b> | <b>-0.657</b> | <b>-0.689</b> | <b>-0.721</b> | <b>-0.646</b> | <b>-0.543</b> | <b>-0.629</b> | <b>-0.638</b> | <b>-0.754</b> | <b>-0.913</b> | <b>-0.922</b> |
| H5                  | 0.546         | 0.551         | 0.558         | 0.566         | 0.576         | 0.494         | 0.447         | 0.498         | 0.516         | 0.606         | 0.617         | 0.620         |
|                     | <b>0.589</b>  | <b>0.601</b>  | <b>0.615</b>  | <b>0.632</b>  | <b>0.651</b>  | <b>0.571</b>  | <b>0.497</b>  | <b>0.575</b>  | <b>0.577</b>  | <b>0.682</b>  | <b>0.753</b>  | <b>0.764</b>  |
| N1                  | -0.656        | -0.655        | -0.654        | -0.655        | -0.656        | -0.645        | -0.693        | -0.683        | -0.652        | -0.654        | -0.612        | -0.610        |
|                     | <b>-0.849</b> | <b>-0.846</b> | <b>-0.844</b> | <b>-0.843</b> | <b>-0.843</b> | <b>-0.768</b> | <b>-0.746</b> | <b>-0.775</b> | <b>-0.783</b> | <b>-0.825</b> | <b>-0.799</b> | <b>-0.838</b> |
| $\overline{A_{H7}}$ | 0.352         | 0.356         | 0.358         | 0.365         | 0.375         | 0.395         | 0.364         | 0.360         | 0.352         | 0.367         | 0.368         | 0.371         |
| $\overline{A_{H5}}$ | 0.355         | 0.376         | 0.399         | 0.412         | 0.421         | 0.371         | 0.357         | 0.353         | 0.340         | 0.421         | 0.430         | 0.433         |

**Table S5** Mulliken charges and APT charges (in bold) of the atoms of TS2 under the  $-x$ -direction field at the MP2/6-311++G(2d,p) level.

|    | <b>0.000</b>  | <b>-0.002</b> | <b>-0.004</b> | <b>-0.006</b> | <b>-0.008</b> | <b>-0.010</b> | <b>-0.012</b> | <b>-0.014</b> | <b>-0.016</b> | <b>-0.018</b> | <b>-0.019</b> | <b>-0.020</b> |
|----|---------------|---------------|---------------|---------------|---------------|---------------|---------------|---------------|---------------|---------------|---------------|---------------|
| O3 | -0.306        | -0.321        | -0.340        | -0.341        | -0.351        | -0.361        | -0.371        | -0.381        | -0.391        | -0.401        | -0.406        | -0.409        |
|    | <b>-0.751</b> | <b>-0.771</b> | <b>-0.790</b> | <b>-0.798</b> | <b>-0.813</b> | <b>-0.828</b> | <b>-0.844</b> | <b>-0.861</b> | <b>-0.880</b> | <b>-0.901</b> | <b>-0.914</b> | <b>-0.930</b> |
| H4 | 0.425         | 0.421         | 0.418         | 0.411         | 0.405         | 0.400         | 0.394         | 0.388         | 0.382         | 0.375         | 0.371         | 0.365         |
|    | <b>0.477</b>  | <b>0.479</b>  | <b>0.480</b>  | <b>0.482</b>  | <b>0.484</b>  | <b>0.485</b>  | <b>0.487</b>  | <b>0.489</b>  | <b>0.491</b>  | <b>0.493</b>  | <b>0.494</b>  | <b>0.495</b>  |
| N1 | -0.527        | -0.576        | -0.620        | -0.565        | -0.570        | -0.574        | -0.579        | -0.584        | -0.590        | -0.599        | -0.606        | -0.619        |
|    | <b>-0.796</b> | <b>-0.821</b> | <b>-0.838</b> | <b>-0.837</b> | <b>-0.848</b> | <b>-0.860</b> | <b>-0.874</b> | <b>-0.887</b> | <b>-0.903</b> | <b>-0.923</b> | <b>-0.935</b> | <b>-0.953</b> |

**Table S6.** Imaginary frequencies ( $\text{Im}\nu$ ,  $\text{cm}^{-1}$ ), Gibbs energies ( $\Delta G$ ,  $\text{kJ/mol}$ ), reaction rate constants ( $k$ ,  $\text{s}^{-1}$ ) and corrected reaction rate constants ( $k_{298.15 \text{ K,C}}$  and  $k_{688 \text{ K,C}}$ ,  $\text{s}^{-1}$ ), Wigner tunneling corrections ( $\kappa$ ) in the absence and presence of fields of varying strengths and directions for the 1,3-intramolecular hydrogen transference path (TS2) at the MP2/6-311++G(2d,p) level.

| Field    | $\text{Im}\nu$ | $\Delta G_{298.15}$ | $k_{298.15 \text{ K}}$ | $\kappa_{298.15 \text{ K}}$ | $\Delta G_{688 \text{ K}}$ | $k_{688 \text{ K}}$   | $\kappa_{688 \text{ K}}$ |
|----------|----------------|---------------------|------------------------|-----------------------------|----------------------------|-----------------------|--------------------------|
| No field | 1955.0         | 158.93              | $9.51 \times 10^{-16}$ | 4.714                       | 179.59                     | $3.32 \times 10^{-1}$ | 1.697                    |
| z-0.010  | 1984.7         | 222.84              | $6.05 \times 10^{-27}$ | 4.828                       | 252.80                     | $9.17 \times 10^{-7}$ | 1.719                    |
| z-0.008  | 1977.6         | 201.03              | $4.01 \times 10^{-23}$ | 4.800                       | 221.13                     | $2.33 \times 10^{-4}$ | 1.714                    |
| z-0.006  | 1970.0         | 188.51              | $6.26 \times 10^{-21}$ | 4.771                       | 210.02                     | $1.63 \times 10^{-3}$ | 1.708                    |
| z-0.004  | 1960.6         | 172.80              | $3.54 \times 10^{-18}$ | 4.735                       | 198.26                     | $1.27 \times 10^{-2}$ | 1.701                    |
| z-0.002  | 1958.1         | 160.25              | $5.59 \times 10^{-16}$ | 4.726                       | 182.08                     | $2.15 \times 10^{-1}$ | 1.700                    |
| z+0.002  | 1949.4         | 157.28              | $1.85 \times 10^{-15}$ | 4.693                       | 176.73                     | $5.47 \times 10^{-1}$ | 1.693                    |
| z+0.004  | 1947.6         | 153.19              | $9.64 \times 10^{-15}$ | 4.686                       | 174.10                     | $8.66 \times 10^{-1}$ | 1.692                    |
| z+0.006  | 1939.8         | 152.83              | $1.11 \times 10^{-14}$ | 4.656                       | 170.70                     | $1.57 \times 10^0$    | 1.687                    |
| z+0.008  | 1934.2         | 146.05              | $1.72 \times 10^{-13}$ | 4.635                       | 169.04                     | $2.10 \times 10^0$    | 1.683                    |
| z+0.010  | 1927.1         | 142.64              | $6.79 \times 10^{-13}$ | 4.609                       | 163.18                     | $5.84 \times 10^0$    | 1.678                    |
| y-0.010  | 1972.0         | 177.92              | $4.48 \times 10^{-19}$ | 4.779                       | 202.05                     | $6.54 \times 10^{-3}$ | 1.710                    |
| y-0.008  | 1970.3         | 173.51              | $2.66 \times 10^{-18}$ | 4.772                       | 195.07                     | $2.22 \times 10^{-2}$ | 1.708                    |
| y-0.006  | 1962.9         | 170.22              | $1.00 \times 10^{-17}$ | 4.744                       | 194.35                     | $2.51 \times 10^{-2}$ | 1.703                    |
| y-0.004  | 1958.3         | 166.57              | $4.36 \times 10^{-17}$ | 4.726                       | 186.22                     | $1.04 \times 10^{-1}$ | 1.700                    |
| y-0.002  | 1957.2         | 161.39              | $3.53 \times 10^{-16}$ | 4.722                       | 183.37                     | $1.71 \times 10^{-1}$ | 1.699                    |
| y+0.002  | 1958.9         | 160.26              | $5.56 \times 10^{-16}$ | 4.729                       | 180.09                     | $3.04 \times 10^{-1}$ | 1.700                    |
| y+0.004  | 1959.8         | 163.55              | $1.48 \times 10^{-16}$ | 4.732                       | 186.81                     | $9.39 \times 10^{-2}$ | 1.701                    |
| y+0.006  | 1960.2         | 172.89              | $3.41 \times 10^{-18}$ | 4.734                       | 196.37                     | $1.77 \times 10^{-2}$ | 1.701                    |
| y+0.008  | 1969.4         | 180.62              | $1.51 \times 10^{-19}$ | 4.769                       | 205.10                     | $3.84 \times 10^{-3}$ | 1.708                    |
| y+0.010  | 1974.0         | 193.18              | $9.51 \times 10^{-22}$ | 4.786                       | 223.29                     | $1.59 \times 10^{-4}$ | 1.711                    |
| x+0.010  | 1985.2         | 149.23              | $4.76 \times 10^{-14}$ | 4.829                       | 165.63                     | $3.81 \times 10^0$    | 1.719                    |
| x+0.008  | 1979.4         | 154.44              | $5.82 \times 10^{-15}$ | 4.807                       | 173.52                     | $9.59 \times 10^{-1}$ | 1.715                    |
| x+0.006  | 1973.6         | 154.92              | $4.8 \times 10^{-15}$  | 4.785                       | 176.06                     | $6.15 \times 10^{-1}$ | 1.711                    |
| x+0.004  | 1968.1         | 156.39              | $2.65 \times 10^{-15}$ | 4.764                       | 177.72                     | $4.60 \times 10^{-1}$ | 1.707                    |
| x+0.002  | 1961.5         | 157.08              | $2.01 \times 10^{-15}$ | 4.739                       | 178.50                     | $4.01 \times 10^{-1}$ | 1.702                    |
| x-0.002  | 1947.4         | 160.77              | $4.53 \times 10^{-16}$ | 4.685                       | 180.67                     | $2.75 \times 10^{-1}$ | 1.692                    |
| x-0.004  | 1939.5         | 162.53              | $2.23 \times 10^{-16}$ | 4.655                       | 184.66                     | $1.37 \times 10^{-1}$ | 1.686                    |
| x-0.006  | 1927.1         | 167.62              | $2.86 \times 10^{-17}$ | 4.609                       | 188.41                     | $7.10 \times 10^{-2}$ | 1.678                    |
| x-0.008  | 1917.0         | 169.78              | $1.20 \times 10^{-17}$ | 4.571                       | 193.85                     | $2.74 \times 10^{-2}$ | 1.671                    |
| x-0.010  | 1906.4         | 173.2               | $3.01 \times 10^{-18}$ | 4.531                       | 196.72                     | $1.66 \times 10^{-2}$ | 1.663                    |
| x-0.012  | 1895.5         | 183.20              | $5.33 \times 10^{-20}$ | 4.491                       | 210.02                     | $1.63 \times 10^{-3}$ | 1.656                    |
| x-0.014  | 1884.1         | 190.13              | $3.25 \times 10^{-21}$ | 4.449                       | 216.85                     | $4.92 \times 10^{-4}$ | 1.648                    |
| x-0.016  | 1871.8         | 206.82              | $3.88 \times 10^{-24}$ | 4.404                       | 239.71                     | $9.05 \times 10^{-6}$ | 1.639                    |
| x-0.018  | 1858.7         | 212.95              | $3.27 \times 10^{-25}$ | 4.357                       | 241.63                     | $6.46 \times 10^{-6}$ | 1.630                    |
| x-0.019  | 1851.0         | 220.76              | $2.48 \times 10^{-28}$ | 4.329                       | 246.46                     | $2.78 \times 10^{-6}$ | 1.625                    |
| x-0.020  | 1843.8         | 233.57              | $7.98 \times 10^{-29}$ | 4.303                       | 248.93                     | $1.80 \times 10^{-6}$ | 1.620                    |

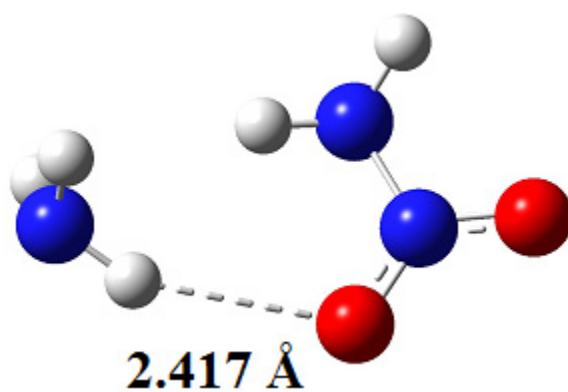

**Figure S1**  $\text{NH}_2\text{NO}_2 \cdots \text{NH}_3$ , in which  $\text{NH}_3$  is only as a H-bonded donor and the binding energy is 18.50 kJ/mol at the MP2/6-311++G(2d,p) level, 32.0 kJ/mol weaker than that of the  $\text{NH}_2\text{NO}_2 \cdots \text{NH}_3$  in which  $\text{NH}_3$  is not only as a H-bonded donor, but also as a H-bonded acceptor.



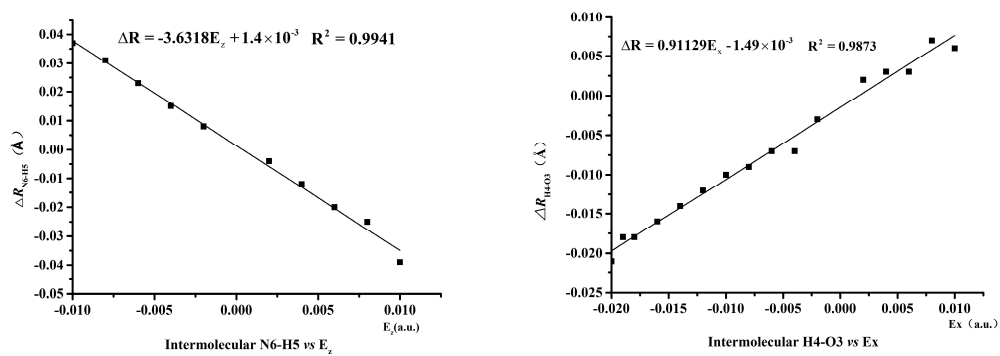

N6...H5 distances vs.  $E_z$  (TS1)    H4...O3 distances vs.  $E_x$  (TS2)

**Figure S2** Changes of the activation distances versus field strengths in the different field orientations for transition states at the MP2/6-311++G(2d,p) level.

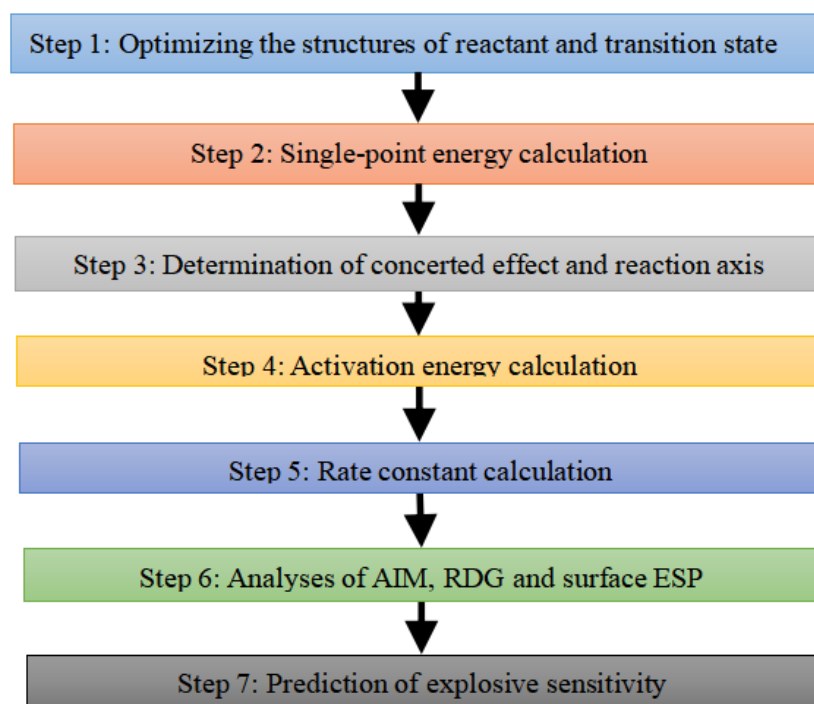

**Figure S3** The research scheme for the effects of external electric fields on the initiation reactions in  $\text{NH}_2\text{NO}_2\cdots\text{NH}_3$

### Cartesian coordinates for the optimized geometries of reactant and transition states

TS1:

No field

Reactant

N,0,-0.1388307297,0.3519007669,-0.0298998831  
N,0,-0.158585254,0.0031223882,1.3038966994  
O,0,-1.236844475,-0.3528205867,1.7772334304  
O,0,0.900358496,0.131879902,1.9225315384  
N,0,2.7033834144,-0.043980718,-0.6781055687  
H,0,2.889801177,0.0147217715,0.3203031404  
H,0,3.1127304258,-0.9110755331,-1.0118374402  
H,0,3.2094764427,0.7148728084,-1.1243657356  
H,0,0.8028090931,0.1957712203,-0.4242245001  
H,0,-0.9164652703,-0.0993088494,-0.497773551

Transition state

|   |                 |                 |                 |
|---|-----------------|-----------------|-----------------|
| N | -0.010478778648 | -0.005312276003 | -0.003318686965 |
| N | -0.009170612835 | -0.000152113714 | 1.320231600914  |
| H | 0.970948482051  | 0.001744848153  | -0.276105580404 |
| O | -1.153543040165 | -0.007109522133 | 1.910594308023  |
| O | 1.039014554030  | 0.010487964201  | 1.982432904788  |
| N | -2.559188570973 | -0.025389807317 | -0.247643245452 |
| H | -1.498157123278 | -0.017793132824 | -0.535555588187 |
| H | -2.311692572416 | -0.019179830342 | 0.796074235024  |
| H | -3.049754405547 | -0.867900889765 | -0.529332097233 |
| H | -3.064770932932 | 0.805591759230  | -0.536769852666 |

X-20:

Z-Matrix found in file.

N

N,1,B1

H,1,B2,2,A1

O,2,B3,1,A2,3,D1,0

O,2,B4,1,A3,3,D2,0

N,1,B5,2,A4,3,D3,0

H,6,B6,1,A5,2,D4,0

H,6,B7,1,A6,2,D5,0

H,6,B8,1,A7,2,D6,0

H,6,B9,1,A8,2,D7,0

Variables:

B1=1.32476608

B2=1.01823686  
B3=1.2819809  
B4=1.24345158  
B5=2.57792323  
B6=1.09523203  
B7=1.06236915  
B8=1.0153425  
B9=1.01538045  
A1=105.32706857  
A2=117.60384661  
A3=121.86083285  
A4=95.57267284  
A5=20.40458392  
A6=72.76626011  
A7=120.8995876  
A8=121.12028983  
D1=-179.94544462  
D2=0.05589426  
D3=179.42228644  
D4=-180.04147478  
D5=0.32024234  
D6=-105.85366849  
D7=106.43835099

X+20:

Z-Matrix found in file.

N

N,1,B1

H,1,B2,2,A1

O,2,B3,1,A2,3,D1,0

O,2,B4,1,A3,3,D2,0

N,1,B5,2,A4,3,D3,0

H,6,B6,1,A5,2,D4,0

H,6,B7,1,A6,2,D5,0

H,6,B8,1,A7,2,D6,0

H,6,B9,1,A8,2,D7,0

Variables:

B1=1.3221599

B2=1.01898847

B3=1.2936114

B4=1.23607688

B5=2.54459155

B6=1.1057071

B7=1.08425361

B8=1.01419313  
B9=1.01416269  
A1=105.69919206  
A2=116.86802539  
A3=122.81084474  
A4=95.52378695  
A5=20.60154275  
A6=69.88630919  
A7=120.99180704  
A8=120.96648871  
D1=-179.67917093  
D2=0.36745183  
D3=178.75000348  
D4=-179.39346888  
D5=0.54816095  
D6=-105.09118685  
D7=106.1306122

X-40:

Z-Matrix found in file.

N

N,1,B1

H,1,B2,2,A1

O,2,B3,1,A2,3,D1,0

O,2,B4,1,A3,3,D2,0

N,1,B5,2,A4,3,D3,0

H,6,B6,1,A5,2,D4,0

H,6,B7,1,A6,2,D5,0

H,6,B8,1,A7,2,D6,0

H,6,B9,1,A8,2,D7,0

Variables:

B1=1.32089265

B2=1.01935414

B3=1.29927005

B4=1.23263617

B5=2.52922666

B6=1.11358831

B7=1.09657716

B8=1.01370263

B9=1.01364829

A1=105.93254452

A2=116.47458241

A3=123.28022002

A4=95.59213186

A5=20.29844094  
A6=68.87702401  
A7=120.89700016  
A8=120.86513912  
D1=-179.5199595  
D2=0.53052315  
D3=178.09645162  
D4=-179.07037065  
D5=0.85913947  
D6=-104.7639165  
D7=106.43050888

X+40:

Z-Matrix found in file.

N

N,1,B1

H,1,B2,2,A1

O,2,B3,1,A2,3,D1,0

O,2,B4,1,A3,3,D2,0

N,1,B5,2,A4,3,D3,0

H,6,B6,1,A5,2,D4,0

H,6,B7,1,A6,2,D5,0

H,6,B8,1,A7,2,D6,0

H,6,B9,1,A8,2,D7,0

Variables:

B1=1.3258996

B2=1.01786562

B3=1.27627887

B4=1.24732872

B5=2.59723396

B6=1.0919707

B7=1.05302189

B8=1.01601254

B9=1.01603557

A1=105.21214011

A2=117.93193144

A3=121.40328805

A4=95.65202037

A5=19.85830996

A6=74.72220198

A7=120.90878928

A8=120.87399876

D1=-180.08621575

D2=-0.0936819

D3=180.003156  
D4=-180.01608943  
D5=0.01057999  
D6=-106.73814733  
D7=106.70604175

X-60

Z-Matrix found in file.

N

N,1,B1

H,1,B2,2,A1

O,2,B3,1,A2,3,D1,0

O,2,B4,1,A3,3,D2,0

N,1,B5,2,A4,3,D3,0

H,6,B6,1,A5,2,D4,0

H,6,B7,1,A6,2,D5,0

H,6,B8,1,A7,2,D6,0

H,6,B9,1,A8,2,D7,0

Variables:

B1=1.31938513

B2=1.01973854

B3=1.30524575

B4=1.22912827

B5=2.5159466

B6=1.12434135

B7=1.11077024

B8=1.01325224

B9=1.01315745

A1=106.26740374

A2=116.08502387

A3=123.74684628

A4=95.64737975

A5=19.76314592

A6=67.92330165

A7=121.14673759

A8=120.28866178

D1=-179.21097559

D2=0.92390672

D3=177.34449269

D4=-177.73673267

D5=1.22891572

D6=-104.42319731

D7=107.01625147

X-80

Z-Matrix found in file.

N

N,1,B1

H,1,B2,2,A1

O,2,B3,1,A2,3,D1,0

O,2,B4,1,A3,3,D2,0

N,1,B5,2,A4,3,D3,0

H,6,B6,1,A5,2,D4,0

H,6,B7,1,A6,2,D5,0

H,6,B8,1,A7,2,D6,0

H,6,B9,1,A8,2,D7,0

Variables:

B1=1.31787918

B2=1.02008827

B3=1.31100843

B4=1.22582452

B5=2.50283161

B6=1.13740938

B7=1.12683476

B8=1.01280635

B9=1.01285548

A1=106.61767273

A2=115.65535255

A3=124.24520474

A4=95.79106852

A5=19.10421865

A6=67.11703471

A7=120.82884635

A8=120.23606372

D1=-179.70982094

D2=0.35900574

D3=178.83263439

D4=-178.93777366

D5=0.65123997

D6=-105.30066451

D7=106.66529611

X-100

Z-Matrix found in file.

N

N,1,B1

H,1,B2,2,A1

O,2,B3,1,A2,3,D1,0



O,2,B4,1,A3,3,D2,0  
N,1,B5,2,A4,3,D3,0  
H,6,B6,1,A5,2,D4,0  
H,6,B7,1,A6,2,D5,0  
H,6,B8,1,A7,2,D6,0  
H,6,B9,1,A8,2,D7,0

Variables:

B1=1.32423099  
B2=1.02560161  
B3=1.31459974  
B4=1.22902223  
B5=2.57678925  
B6=1.09953595  
B7=1.11658817  
B8=1.01563818  
B9=1.01180116  
A1=104.33472374  
A2=114.83924737  
A3=124.90113353  
A4=85.71997612  
A5=21.56375557  
A6=68.17713432  
A7=114.85309395  
A8=126.2302801  
D1=-162.2961559  
D2=18.03809513  
D3=120.7864902  
D4=-168.79860112  
D5=25.286796  
D6=-81.75266927  
D7=131.1747262

X-120

Z-Matrix found in file.

N

N,1,B1  
H,1,B2,2,A1  
O,2,B3,1,A2,3,D1,0  
O,2,B4,1,A3,3,D2,0  
N,1,B5,2,A4,3,D3,0  
H,6,B6,1,A5,2,D4,0  
H,6,B7,1,A6,2,D5,0  
H,6,B8,1,A7,2,D6,0  
H,6,B9,1,A8,2,D7,0

Variables:

B1=1.32471097  
B2=1.02681613  
B3=1.31521818  
B4=1.23054739  
B5=2.60322289  
B6=1.08854952  
B7=1.10674758  
B8=1.01684948  
B9=1.01189274  
A1=104.02423173  
A2=114.71770185  
A3=124.98728868  
A4=82.56572963  
A5=22.87282952  
A6=69.01421569  
A7=112.36354585  
A8=128.92967158  
D1=-160.03266011  
D2=19.6423121  
D3=112.08846437  
D4=-171.06441625  
D5=28.28533239  
D6=-79.05739406  
D7=134.30757294

X-160

Z-Matrix found in file.

N

N,1,B1

H,1,B2,2,A1

O,2,B3,1,A2,3,D1,0

O,2,B4,1,A3,3,D2,0

N,1,B5,2,A4,3,D3,0

H,6,B6,1,A5,2,D4,0

H,6,B7,1,A6,2,D5,0

H,6,B8,1,A7,2,D6,0

H,6,B9,1,A8,2,D7,0

Variables:

B1=1.32495867  
B2=1.02771923  
B3=1.31247411  
B4=1.23422498  
B5=2.64288296

B6=1.0758513  
B7=1.08877286  
B8=1.01852699  
B9=1.01241144  
A1=103.72248542  
A2=114.86630281  
A3=124.81460031  
A4=78.24164226  
A5=24.77403931  
A6=70.75212768  
A7=109.04771801  
A8=132.52878978  
D1=-158.54563483  
D2=19.80758798  
D3=102.55917696  
D4=-174.59209227  
D5=31.12648066  
D6=-76.57005184  
D7=137.61589147

X-180

Z-Matrix found in file.

N

N,1,B1

H,1,B2,2,A1

O,2,B3,1,A2,3,D1,0

O,2,B4,1,A3,3,D2,0

N,1,B5,2,A4,3,D3,0

H,6,B6,1,A5,2,D4,0

H,6,B7,1,A6,2,D5,0

H,6,B8,1,A7,2,D6,0

H,6,B9,1,A8,2,D7,0

Variables:

B1=1.32505944

B2=1.02775956

B3=1.31261747

B4=1.23413274

B5=2.64461625

B6=1.07609464

B7=1.0888029

B8=1.01854396

B9=1.01240596

A1=103.73933701

A2=114.8790224

A3=124.82818125  
A4=78.17485935  
A5=24.75185836  
A6=70.71383816  
A7=109.19900298  
A8=132.35091181  
D1=-158.46467261  
D2=19.88301627  
D3=102.42187811  
D4=-174.29941285  
D5=31.15988758  
D6=-76.49966314  
D7=137.6929242

X-200

Z-Matrix found in file.

N

N,1,B1

H,1,B2,2,A1

O,2,B3,1,A2,3,D1,0

O,2,B4,1,A3,3,D2,0

N,1,B5,2,A4,3,D3,0

H,6,B6,1,A5,2,D4,0

H,6,B7,1,A6,2,D5,0

H,6,B8,1,A7,2,D6,0

H,6,B9,1,A8,2,D7,0

Variables:

B1=1.31006812

B2=1.02403127

B3=1.34787581

B4=1.20599937

B5=2.49894421

B6=1.31480426

B7=1.31473005

B8=1.01431839

B9=1.01327905

A1=109.18197208

A2=113.06744557

A3=127.08729458

A4=95.47029446

A5=13.1371007

A6=61.58049745

A7=117.44063716

A8=117.20337167

D1=-170.04493971  
D2=12.01358154  
D3=154.28672267  
D4=-167.78245348  
D5=11.20558146  
D6=-99.09675308  
D7=125.67011322

TS2:

No field

Transition state

N,0,0.179619372,-0.2283193224,0.142838143  
N,0,-0.1247602028,-0.0616459716,1.4036723497  
H,0,1.1816847343,-0.072717186,-0.0897998946  
H,0,-1.0945383133,-0.4300438482,0.1910942552  
O,0,0.5823763775,0.2237800273,2.3578368918  
O,0,-1.4289611332,-0.2749630091,1.4584875998  
N,0,3.0302499376,0.3217192624,0.1487372851  
H,0,2.9837125782,0.4858585426,1.1518750921  
H,0,3.7056675296,-0.4211926919,-0.0032235565  
H,0,3.4105191947,1.1618770505,-0.2763537668

X-20

|   |                 |                 |                 |
|---|-----------------|-----------------|-----------------|
| N | -0.175000568660 | -0.016541795048 | -0.121303108722 |
| N | 0.118752837647  | 0.001967870491  | 1.152654841187  |
| H | 0.642271936788  | -0.011473379305 | -0.770851623221 |
| H | -1.321324592105 | -0.033711303255 | 0.469256368044  |
| O | 1.198679568799  | 0.028431022991  | 1.717580278770  |
| O | -1.061889977312 | -0.014329044743 | 1.759945333480  |
| N | 2.335441970332  | 0.006860291151  | -1.573143079178 |
| H | 2.933584109159  | 0.027279189126  | -0.750232437086 |
| H | 2.577704090172  | 0.819960715100  | -2.132099782825 |
| H | 2.605879623949  | -0.810835563972 | -2.111996795678 |

X+20

|   |                 |                 |                 |
|---|-----------------|-----------------|-----------------|
| N | -0.255417503917 | 0.042739967437  | -0.167989131395 |
| N | 0.176742864421  | -0.014328874366 | 1.064797046536  |
| H | 0.488112377599  | 0.040892699953  | -0.891040128648 |
| H | -1.333103169588 | 0.046235067744  | 0.545935763050  |
| O | 1.318559784159  | -0.063037212947 | 1.502183572173  |
| O | -0.918017689665 | -0.009060554660 | 1.799656970689  |
| N | 2.317266873102  | -0.001699898996 | -1.543543059010 |
| H | 2.719343594982  | -0.042756161795 | -0.609710042162 |

|   |                |                 |                 |
|---|----------------|-----------------|-----------------|
| H | 2.699924338864 | 0.816281238173  | -2.007177665067 |
| H | 2.640687530018 | -0.817658268400 | -2.053303326327 |

X-40

|   |                 |                 |                 |
|---|-----------------|-----------------|-----------------|
| N | -0.122022267767 | -0.020532320635 | -0.086900440473 |
| N | 0.083296327694  | 0.016158623094  | 1.203500206988  |
| H | 0.731457311225  | -0.015076627970 | -0.693805844236 |
| H | -1.304766338867 | -0.044391510199 | 0.423764545842  |
| O | 1.116477564479  | 0.061560196818  | 1.844886861494  |
| O | -1.142738582089 | -0.006879899737 | 1.726499633064  |
| N | 2.351479162371  | -0.001217268330 | -1.592903285662 |
| H | 3.045646098424  | 0.021910698423  | -0.849157024277 |
| H | 2.534116292342  | 0.807431852079  | -2.180732145009 |
| H | 2.561153429749  | -0.821355743163 | -2.155342517961 |

X+40

Z-Matrix found in file.

N

N,1,B1

H,1,B2,2,A1

O,2,B3,1,A2,3,D1,0

O,2,B4,1,A3,3,D2,0

H,1,B5,2,A4,3,D3,0

N,3,B6,1,A5,2,D4,0

H,7,B7,3,A6,1,D5,0

H,7,B8,3,A7,1,D6,0

H,7,B9,3,A8,1,D7,0

Variables:

B1=1.30559576

B2=1.05970935

B3=1.34645671

B4=1.21423105

B5=1.28419035

B6=1.80300255

B7=1.01884704

B8=1.01736068

B9=1.01735739

A1=114.23302934

A2=103.59176692

A3=131.71451908

A4=75.90737622

A5=165.78795319

A6=103.47048306

A7=117.33624652

A8=117.41143768  
D1=179.79853466  
D2=-0.20340921  
D3=-179.7534042  
D4=0.00883097  
D5=-0.140054  
D6=115.90407972  
D7=-116.22961861

X-60

Z-Matrix found in file.

N

N,1,B1

H,1,B2,2,A1

O,2,B3,1,A2,3,D1,0

O,2,B4,1,A3,3,D2,0

H,1,B5,2,A4,3,D3,0

N,3,B6,1,A5,2,D4,0

H,7,B7,3,A6,1,D5,0

H,7,B8,3,A7,1,D6,0

H,7,B9,3,A8,1,D7,0

Variables:

B1=1.30625597

B2=1.05306498

B3=1.33909053

B4=1.21611493

B5=1.28591507

B6=1.8326124

B7=1.01833102

B8=1.01682101

B9=1.0168253

A1=114.55621031

A2=103.82419931

A3=131.32256192

A4=75.87202225

A5=165.21260664

A6=102.21086602

A7=117.53111488

A8=117.41928478

D1=-179.98514901

D2=0.01887718

D3=179.98380928

D4=-0.17476666

D5=0.35087429

D6=116.08789225  
D7=-115.32594283

X+60

Z-Matrix found in file.

N

N,1,B1

H,1,B2,2,A1

O,2,B3,1,A2,3,D1,0

O,2,B4,1,A3,3,D2,0

H,1,B5,2,A4,3,D3,0

N,3,B6,1,A5,2,D4,0

H,7,B7,3,A6,1,D5,0

H,7,B8,3,A7,1,D6,0

H,7,B9,3,A8,1,D7,0

Variables:

B1=1.30548354

B2=1.06120408

B3=1.3479788

B4=1.21388523

B5=1.28385962

B6=1.79660799

B7=1.01896273

B8=1.01746844

B9=1.01746556

A1=114.15224772

A2=103.55722912

A3=131.79040741

A4=75.92309412

A5=165.7903996

A6=103.60503243

A7=117.39774638

A8=117.40051628

D1=179.94909198

D2=-0.05906613

D3=-179.92627008

D4=-0.01669875

D5=-0.32728055

D6=115.75523073

D7=-116.4232273

X-80

Z-Matrix found in file.



N

N,1,B1

H,1,B2,2,A1

O,2,B3,1,A2,3,D1,0

O,2,B4,1,A3,3,D2,0

H,1,B5,2,A4,3,D3,0

N,3,B6,1,A5,2,D4,0

H,7,B7,3,A6,1,D5,0

H,7,B8,3,A7,1,D6,0

H,7,B9,3,A8,1,D7,0

Variables:

B1=1.30573489

B2=1.05824174

B3=1.34493421

B4=1.21459516

B5=1.28448568

B6=1.8094018

B7=1.01873248

B8=1.0172448

B9=1.01724227

A1=114.310453

A2=103.63966949

A3=131.6351336

A4=75.89995459

A5=165.72386336

A6=103.24318991

A7=117.32333092

A8=117.44251153

D1=-180.17634172

D2=-0.183666

D3=180.21814725

D4=0.12632091

D5=0.04355426

D6=116.02051746

D7=-115.99137451

X+80

|   |                 |                |                 |
|---|-----------------|----------------|-----------------|
| N | -0.321191439387 | 0.035105800774 | -0.179647815685 |
|---|-----------------|----------------|-----------------|

|   |                |                |                |
|---|----------------|----------------|----------------|
| N | 0.210446049726 | 0.000075255121 | 1.013364615625 |
|---|----------------|----------------|----------------|

|   |                |                |                 |
|---|----------------|----------------|-----------------|
| H | 0.348286944664 | 0.032712550088 | -0.962083738885 |
|---|----------------|----------------|-----------------|

|   |                 |                |                |
|---|-----------------|----------------|----------------|
| H | -1.343983341803 | 0.037679388696 | 0.621818494634 |
|---|-----------------|----------------|----------------|

|   |                |                 |                |
|---|----------------|-----------------|----------------|
| O | 1.391855703116 | -0.030606036140 | 1.355988437460 |
|---|----------------|-----------------|----------------|

|   |                 |                |                |
|---|-----------------|----------------|----------------|
| O | -0.807916108811 | 0.004216828622 | 1.834863880928 |
|---|-----------------|----------------|----------------|

|   |                |                 |                 |
|---|----------------|-----------------|-----------------|
| N | 2.332382715280 | -0.010805752166 | -1.543866771648 |
|---|----------------|-----------------|-----------------|

|   |                |                 |                 |
|---|----------------|-----------------|-----------------|
| H | 2.561782593778 | -0.047136768567 | -0.553193558658 |
| H | 2.768797006282 | 0.809462124290  | -1.949266387850 |
| H | 2.713638875744 | -0.833095383510 | -1.998167161857 |

X-100

Z-Matrix found in file.

N

N,1,B1

H,1,B2,2,A1

O,2,B3,1,A2,3,D1,0

O,2,B4,1,A3,3,D2,0

H,1,B5,2,A4,3,D3,0

N,3,B6,1,A5,2,D4,0

H,7,B7,3,A6,1,D5,0

H,7,B8,3,A7,1,D6,0

H,7,B9,3,A8,1,D7,0

Variables:

B1=1.30518078

B2=1.06424691

B3=1.35113368

B4=1.21316037

B5=1.28332523

B6=1.7845543

B7=1.01918585

B8=1.01768789

B9=1.01768189

A1=113.99319547

A2=103.45882901

A3=131.95199757

A4=75.9298606

A5=165.93499663

A6=104.0182312

A7=117.39123898

A8=117.37810914

D1=180.66822294

D2=0.70625861

D3=-180.8391107

D4=-0.01771556

D5=-0.51607076

D6=115.68148959

D7=-116.71631899

Z-20

Z-Matrix found in file.

N

N,1,B1

H,1,B2,2,A1

H,1,B3,2,A2,3,D1,0

O,2,B4,1,A3,3,D2,0

O,2,B5,1,A4,3,D3,0

N,3,B6,1,A5,2,D4,0

H,7,B7,3,A6,1,D5,0

H,7,B8,3,A7,1,D6,0

H,7,B9,3,A8,1,D7,0

Variables:

B1=1.31058914

B2=1.03750833

B3=1.28739055

B4=1.22043767

B5=1.31973644

B6=1.94538703

B7=1.01838452

B8=1.01548309

B9=1.01547366

A1=114.5941322

A2=75.81857942

A3=130.38073806

A4=104.31837988

A5=154.73664805

A6=92.59798611

A7=120.29430214

A8=120.22051497

D1=-177.53232972

D2=-2.09297614

D3=177.99130625

D4=0.56447459

D5=0.86664301

D6=-110.57849399

D7=112.32642335

Z+20

|   |                 |                 |                 |
|---|-----------------|-----------------|-----------------|
| N | -0.149241279946 | 0.009769008914  | -0.101583063578 |
| N | 0.097332431603  | 0.001134163506  | 1.179861893573  |
| H | 0.687101144080  | 0.005019878130  | -0.727018748631 |
| H | -1.320388746495 | 0.017527262338  | 0.448015325364  |
| O | 1.157000900478  | -0.011592578290 | 1.786865391900  |
| O | -1.103551212668 | 0.009218526666  | 1.745671403799  |
| N | 2.353607364501  | -0.006258596161 | -1.578849552159 |

|   |                |                 |                 |
|---|----------------|-----------------|-----------------|
| H | 3.022297859288 | -0.018899419974 | -0.813191049218 |
| H | 2.563591191509 | 0.811477170368  | -2.143968858896 |
| H | 2.546349348534 | -0.819787413654 | -2.155992738459 |

Z-40

Z-Matrix found in file.

N

N,1,B1

H,1,B2,2,A1

H,1,B3,2,A2,3,D1,0

O,2,B4,1,A3,3,D2,0

O,2,B5,1,A4,3,D3,0

N,3,B6,1,A5,2,D4,0

H,7,B7,3,A6,1,D5,0

H,7,B8,3,A7,1,D6,0

H,7,B9,3,A8,1,D7,0

Variables:

B1=1.31353042

B2=1.03489212

B3=1.28346986

B4=1.21918705

B5=1.31705149

B6=1.9872198

B7=1.01908536

B8=1.01560669

B9=1.01556251

A1=114.52352175

A2=75.89306653

A3=130.35013654

A4=104.21020309

A5=151.87748123

A6=89.69249097

A7=121.21773301

A8=121.8419305

D1=-178.20296006

D2=-1.52565847

D3=178.55238694

D4=0.24620764

D5=0.86686434

D6=-108.59278541

D7=110.48843602

Z+40

Z-Matrix found in file.

N

N,1,B1

H,1,B2,2,A1

H,1,B3,2,A2,3,D1,0

O,2,B4,1,A3,3,D2,0

O,2,B5,1,A4,3,D3,0

N,3,B6,1,A5,2,D4,0

H,7,B7,3,A6,1,D5,0

H,7,B8,3,A7,1,D6,0

H,7,B9,3,A8,1,D7,0

Variables:

B1=1.30265162

B2=1.0454716

B3=1.29834937

B4=1.22187094

B5=1.33023601

B6=1.87154798

B7=1.0160031

B8=1.01664784

B9=1.01664338

A1=118.64370866

A2=75.67506797

A3=130.98455221

A4=104.30211979

A5=171.83961663

A6=114.35831228

A7=111.21190537

A8=111.21528024

D1=-180.02754857

D2=0.0206345

D3=180.01884165

D4=179.93051573

D5=-180.24923403

D6=-301.0866818

D7=-59.40868389

Z-60

Z-Matrix found in file.

N

N,1,B1

H,1,B2,2,A1

H,1,B3,2,A2,3,D1,0

O,2,B4,1,A3,3,D2,0

O,2,B5,1,A4,3,D3,0

N,3,B6,1,A5,2,D4,0  
H,7,B7,3,A6,1,D5,0  
H,7,B8,3,A7,1,D6,0  
H,7,B9,3,A8,1,D7,0

Variables:

B1=1.31790388  
B2=1.03315189  
B3=1.28508402  
B4=1.21766766  
B5=1.31488821  
B6=2.03268641  
B7=1.01962409  
B8=1.01593682  
B9=1.01563334  
A1=113.88746263  
A2=75.57243027  
A3=130.33394629  
A4=104.13179202  
A5=149.95475099  
A6=87.37517589  
A7=120.87904661  
A8=124.27506664  
D1=-166.16326877  
D2=-11.79085212  
D3=168.79556408  
D4=1.73121132  
D5=6.3648589  
D6=-101.0983475  
D7=114.54740621

Z+60

|   |                 |                 |                 |
|---|-----------------|-----------------|-----------------|
| N | -0.039682674490 | -0.001398480124 | -0.035611880527 |
| N | 0.030428490692  | -0.000614414119 | 1.263048788730  |
| H | 0.862310461283  | -0.000708510490 | -0.573890833217 |
| H | -1.280593379862 | -0.002298685985 | 0.352640537847  |
| O | 0.992058984461  | 0.000744613667  | 2.018931084239  |
| O | -1.242325761227 | -0.001568005009 | 1.661652544055  |
| N | 2.395697647373  | 0.000607704113  | -1.594733738195 |
| H | 3.249677596146  | 0.005042111248  | -1.044039514378 |
| H | 2.440655762786  | 0.811710916033  | -2.206570290995 |
| H | 2.445871872129  | -0.813909246083 | -2.201616700524 |

Z-80

Z-Matrix found in file.

N

N,1,B1

H,1,B2,2,A1

H,1,B3,2,A2,3,D1,0

O,2,B4,1,A3,3,D2,0

O,2,B5,1,A4,3,D3,0

N,3,B6,1,A5,2,D4,0

H,7,B7,3,A6,1,D5,0

H,7,B8,3,A7,1,D6,0

H,7,B9,3,A8,1,D7,0

Variables:

B1=1.32239305

B2=1.0315668

B3=1.28608256

B4=1.21612544

B5=1.31274174

B6=2.07820065

B7=1.02008936

B8=1.01640997

B9=1.01572895

A1=113.32692005

A2=75.32012988

A3=130.27717453

A4=104.06855727

A5=148.38221158

A6=85.27997368

A7=118.93559512

A8=128.11283802

D1=-161.27150648

D2=-16.07758394

D3=164.76947839

D4=0.87255942

D5=12.39371315

D6=-93.0260448

D7=119.32363154

Z+80

|   |                 |                 |                 |
|---|-----------------|-----------------|-----------------|
| N | -0.007375234783 | -0.001653929614 | -0.019021990300 |
| N | 0.019786052556  | -0.001662286246 | 1.279221327468  |
| H | 0.909253343992  | -0.000878308414 | -0.538759402561 |
| H | -1.263639883283 | 0.002056657991  | 0.329983612864  |
| O | 0.953840522432  | -0.004432582044 | 2.071129038268  |
| O | -1.267544453050 | 0.001328559542  | 1.637047298085  |
| N | 2.400411313912  | 0.000793624077  | -1.594389837859 |

|   |                |                 |                 |
|---|----------------|-----------------|-----------------|
| H | 3.292948832800 | 0.004340846515  | -1.108692787618 |
| H | 2.406475218138 | 0.810217642390  | -2.210968626235 |
| H | 2.409943287208 | -0.812502220810 | -2.205738632504 |

Z-100

Z-Matrix found in file.

N

N,1,B1

H,1,B2,2,A1

H,1,B3,2,A2,3,D1,0

O,2,B4,1,A3,3,D2,0

O,2,B5,1,A4,3,D3,0

N,3,B6,1,A5,2,D4,0

H,7,B7,3,A6,1,D5,0

H,7,B8,3,A7,1,D6,0

H,7,B9,3,A8,1,D7,0

Variables:

B1=1.32740138

B2=1.03012506

B3=1.28824699

B4=1.21440953

B5=1.31078732

B6=2.12881078

B7=1.01587507

B8=1.0203087

B9=1.01707661

A1=112.67279231

A2=74.98409685

A3=130.20429766

A4=104.0016595

A5=146.79150785

A6=133.84095908

A7=83.76848425

A8=114.73593505

D1=-156.73105242

D2=-20.12034391

D3=160.99319081

D4=-1.07369322

D5=127.56106659

D6=21.35990221

D7=277.5527353

Z+100

Z-Matrix found in file.



N

N,1,B1

H,1,B2,2,A1

O,2,B3,1,A2,3,D1,0

O,2,B4,1,A3,3,D2,0

H,1,B5,2,A4,3,D3,0

N,3,B6,1,A5,2,D4,0

H,7,B7,3,A6,1,D5,0

H,7,B8,3,A7,1,D6,0

H,7,B9,3,A8,1,D7,0

Variables:

B1=1.29625438

B2=1.05537491

B3=1.226162

B4=1.33811297

B5=1.31154641

B6=1.82910595

B7=1.01772662

B8=1.01681931

B9=1.01905235

A1=121.71827073

A2=131.67708891

A3=104.44123806

A4=75.42348455

A5=160.73357463

A6=113.33090382

A7=120.09910528

A8=105.62066171

D1=-0.37363752

D2=179.63092786

D3=-179.56097731

D4=-179.68805356

D5=88.41356942

D6=214.90117145

D7=-26.25129388

0 field Reactant:

N,0,0.1315512978,-0.3477164016,0.1549957505

N,0,0.2024178136,-0.0114519864,1.4903546951

H,0,0.8868602495,0.1133007097,-0.339183404

O,0,-0.8300012992,-0.153636111,2.149555932

O,0,1.2963527893,0.3475744522,1.9236516742

N,0,-2.7380492168,0.0234710704,-0.3742172461

H,0,-0.8261590755,-0.1944349912,-0.1998490218

H,0,-2.8822720489,-0.0442098805,0.6305718656  
H,0,-3.2501053109,-0.7405830812,-0.8044715352  
H,0,-3.173727979,0.8861289397,-0.6852553203

X-Reactant

|   |   |           |           |           |
|---|---|-----------|-----------|-----------|
| N | 0 | -0.217235 | 0.371967  | 0.171327  |
| N | 0 | -0.485107 | -0.011050 | 1.466995  |
| H | 0 | 0.784115  | 0.225251  | -0.050710 |
| O | 0 | 0.437530  | 0.094559  | 2.275816  |
| O | 0 | -1.635687 | -0.373764 | 1.720416  |
| N | 0 | 2.667004  | -0.011395 | -0.151015 |
| H | 0 | 2.850771  | -0.007609 | 0.849457  |
| H | 0 | 3.187807  | 0.764555  | -0.549517 |
| H | 0 | 3.078275  | -0.861652 | -0.524699 |
| H | 0 | -0.893111 | -0.065585 | -0.443826 |

X+20-Reactant

|   |   |           |           |           |
|---|---|-----------|-----------|-----------|
| N | 0 | -0.266916 | 0.339103  | 0.104534  |
| N | 0 | -0.409452 | -0.010957 | 1.431489  |
| H | 0 | 0.705060  | 0.187355  | -0.199051 |
| O | 0 | 0.588181  | 0.124560  | 2.146446  |
| O | 0 | -1.522726 | -0.372401 | 1.802500  |
| N | 0 | 2.667228  | -0.006668 | -0.136463 |
| H | 0 | 2.612023  | 0.064220  | 0.877113  |
| H | 0 | 3.229234  | 0.770672  | -0.468252 |
| H | 0 | 3.169403  | -0.860094 | -0.358585 |
| H | 0 | -0.997673 | -0.110513 | -0.435488 |

X+80-Reactant

|   |   |           |           |           |
|---|---|-----------|-----------|-----------|
| N | 0 | -0.209689 | 0.287806  | -0.022178 |
| N | 0 | -0.263905 | 0.064188  | 1.340375  |
| H | 0 | 0.685809  | -0.022190 | -0.401867 |
| O | 0 | 0.816766  | 0.104685  | 1.947001  |
| O | 0 | -1.366270 | -0.092037 | 1.842377  |
| N | 0 | 2.845270  | -0.209657 | -0.210282 |
| H | 0 | 2.515270  | -0.085843 | 0.745959  |
| H | 0 | 3.397859  | 0.603734  | -0.458357 |
| H | 0 | 3.449903  | -1.023004 | -0.235636 |
| H | 0 | -1.051467 | -0.074482 | -0.458663 |

X-80-Reactant

|   |   |           |          |          |
|---|---|-----------|----------|----------|
| N | 0 | -0.022465 | 0.341511 | 0.307398 |
| N | 0 | -0.694528 | 0.036916 | 1.458254 |
| H | 0 | 0.997394  | 0.119490 | 0.336957 |

|   |   |           |           |           |
|---|---|-----------|-----------|-----------|
| O | 0 | -1.909114 | -0.198581 | 1.353432  |
| O | 0 | -0.061973 | 0.076761  | 2.510597  |
| N | 0 | 2.806724  | -0.228754 | 0.042758  |
| H | 0 | 3.321312  | 0.022633  | 0.884074  |
| H | 0 | 3.067641  | -1.190445 | -0.161502 |
| H | 0 | 3.211465  | 0.332006  | -0.703757 |
| H | 0 | -0.540553 | -0.021045 | -0.482950 |

#### X-160-Reactant

|   |   |           |           |           |
|---|---|-----------|-----------|-----------|
| N | 0 | 0.286229  | -0.261650 | 1.100046  |
| N | 0 | -0.972256 | 0.068280  | 0.813334  |
| O | 0 | -1.848504 | -0.152747 | 1.680679  |
| O | 0 | -1.217058 | 0.538289  | -0.307208 |
| N | 0 | 2.647016  | 0.495464  | -0.133366 |
| H | 0 | 3.096367  | 1.299025  | 0.304177  |
| H | 0 | 3.306193  | -0.271574 | 0.002121  |
| H | 0 | 2.671533  | 0.687990  | -1.132771 |
| H | 0 | 1.107353  | 0.100445  | 0.509988  |
| H | 0 | 0.405491  | -0.500253 | 2.076016  |

#### X-200-Reactant

|   |   |           |           |           |
|---|---|-----------|-----------|-----------|
| N | 0 | 0.086284  | 0.098858  | 1.048053  |
| N | 0 | -1.219853 | 0.120614  | 0.906236  |
| O | 0 | -1.994046 | -0.060796 | 1.913317  |
| O | 0 | -1.719556 | 0.323145  | -0.238144 |
| N | 0 | 2.813398  | 0.319773  | -0.150773 |
| H | 0 | 3.034573  | 1.260157  | -0.488062 |
| H | 0 | 3.461776  | 0.103587  | 0.613834  |
| H | 0 | 2.995565  | -0.342834 | -0.908663 |
| H | 0 | 1.810955  | 0.259841  | 0.169202  |
| H | 0 | 0.213268  | -0.079078 | 2.048014  |
